# Supplementary material for: Eco-friendly development of an ultrasmall IONP-loaded nanoplatform for bimodal imaging-guided cancer theranostics
Source: Royal Society of Chemistry journal article supplement (doi:10.1039/d0bm00867b), 2020-01-01
Supplement: d0bm00867b1.pdf [file d0bm00867b1.pdf]

## Supplementary Information

### Eco-Friendly Development of Ultrasmall IONP-loaded Nanoplatfom for Bimodal Imaging-guided Cancer Theranostics

Yulin Li, <sup>a,\*</sup> Ling Zheng, <sup>a,#</sup> Lan Xiao, <sup>b,c</sup> Liudi Wang, <sup>a</sup> Jingyuan Cui, <sup>a</sup> Dongyong Sha, <sup>a</sup>  
Changsheng Liu <sup>a\*</sup>

<sup>a</sup> The State Key Laboratory of Bioreactor Engineering and Key Laboratory for Ultrafine Materials of Ministry of Education, Key Laboratory for Ultrafine Materials of Ministry of Education, Engineering Research Centre for Biomedical Materials of Ministry of Education, East China University of Science and Technology, Shanghai 200237, China.

<sup>b</sup> Institute of Health and Biomedical Innovation, Queensland University of Technology, 60 Musk Avenue, Kelvin Grove, Brisbane, QLD 4059, Australia

<sup>c</sup> The Australia-China Centre for Tissue Engineering and Regenerative Medicine (ACCTERM)

E-mail address: yulinli@ecust.edu.cn (Yulin Li); csliu@ecust.edu.cn (Changsheng Liu).

<sup>#</sup> The authors contributed to the work equally

\* Corresponding author

### Supplementary Figures and Tables

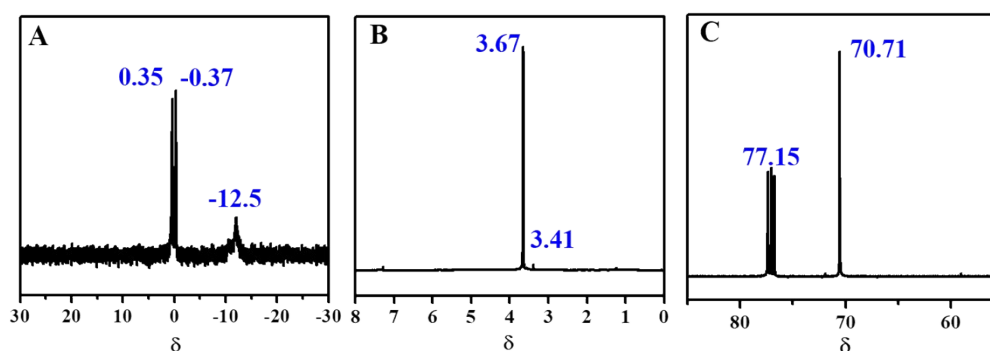

Figure S1. Nuclear magnetic resonance spectra (<sup>31</sup>P-NMR (A), <sup>1</sup>H-NMR (B), <sup>13</sup>C-NMR (C)) of PO-PEG sample.

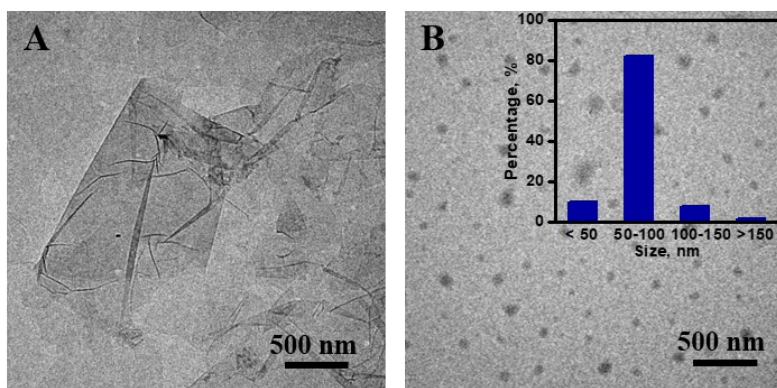

Figure S2. TEM images of pristine GO (a) and small-sized GO nanosheets (b) after ultrasonic treatment.

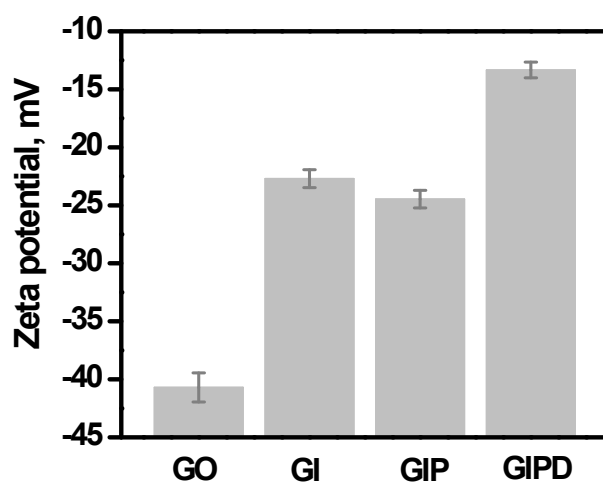

Figure S3. Zeta potentials of GO, GI, GIP and GIPD nanoparticles.

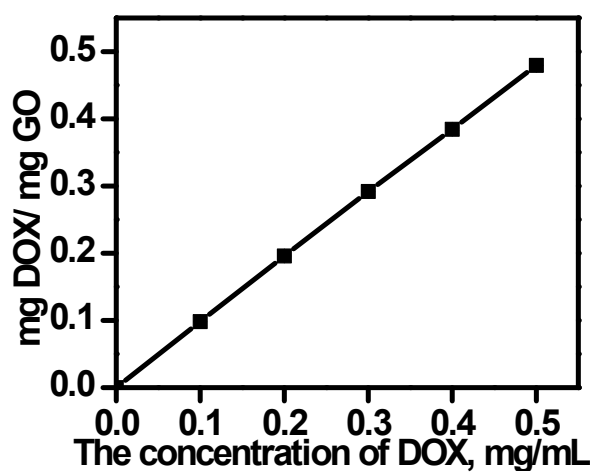

Figure S4. Drug content of GIP as a function of DOX concentration (from 0.1 mg/mL to 0.5 mg/mL)

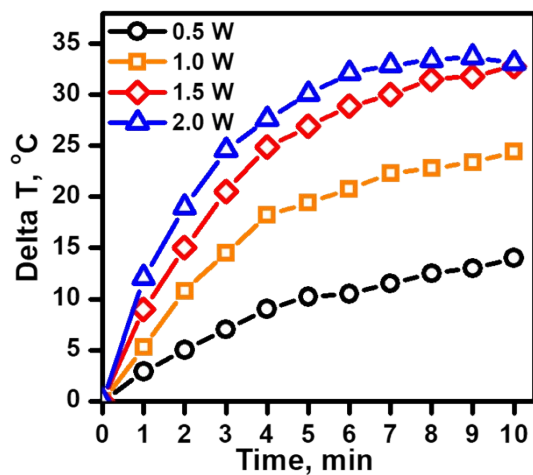

Figure S5. Temperature change of GIP solution after NIR irradiation at different power densities (0.5 W/cm<sup>2</sup>, 1.0 W/cm<sup>2</sup>, 1.5 W/cm<sup>2</sup>, 2.0 W/cm<sup>2</sup>) as a function of treatment time.

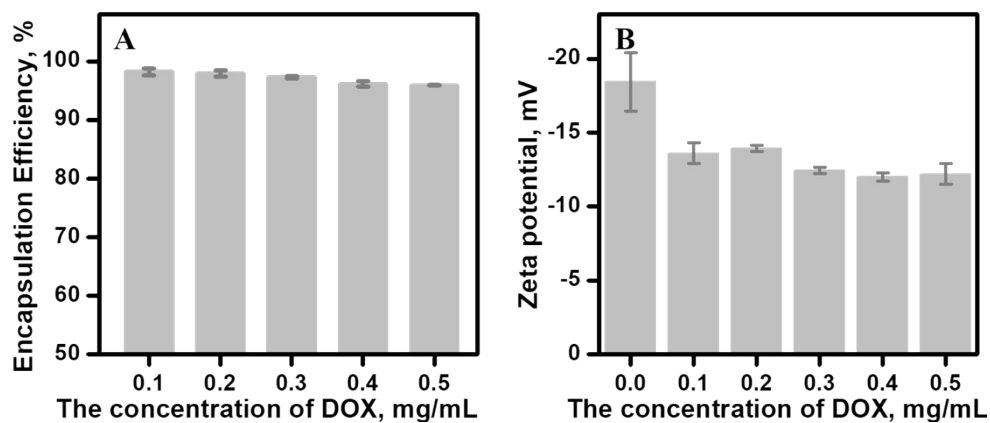

Figure S6. Encapsulation efficiency(A) and Zeta potential (B) of GIP nanoparticles when different amount of DOX was used for loading.

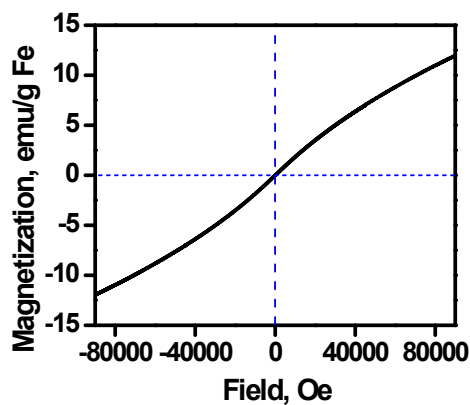

Figure S7. Magnetization curves of the GIPD nanoparticles with field values of  $\pm 9$  T at the temperature of 300 K.

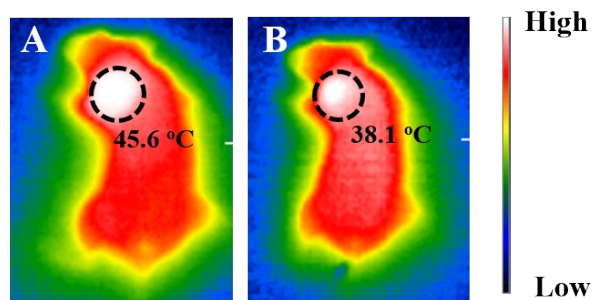

Figure S8. The surface photothermal images of tumor immediately (A) upon 5 min NIR irradiation and 2 min later after irradiation removal (B).
